# Supplementary material for: Visual and Anatomical Outcomes of a Single Intravitreal Dexamethasone in Diabetic Macular Edema: An 8 Year Real-World Study
Source: MDPI journal article supplement (doi:10.3390/jcm12123878), 2023-06-06

Patients with DMO started on intravitreal dexamethasone (n = 418)

Treatment duration < 6 months (n = 50)  
Incomplete baseline values (n = 26)  
Incomplete follow-up (n = 71)  
Distinct eyes (n = 31)

Cohort taken forward for analysis (n = 240)

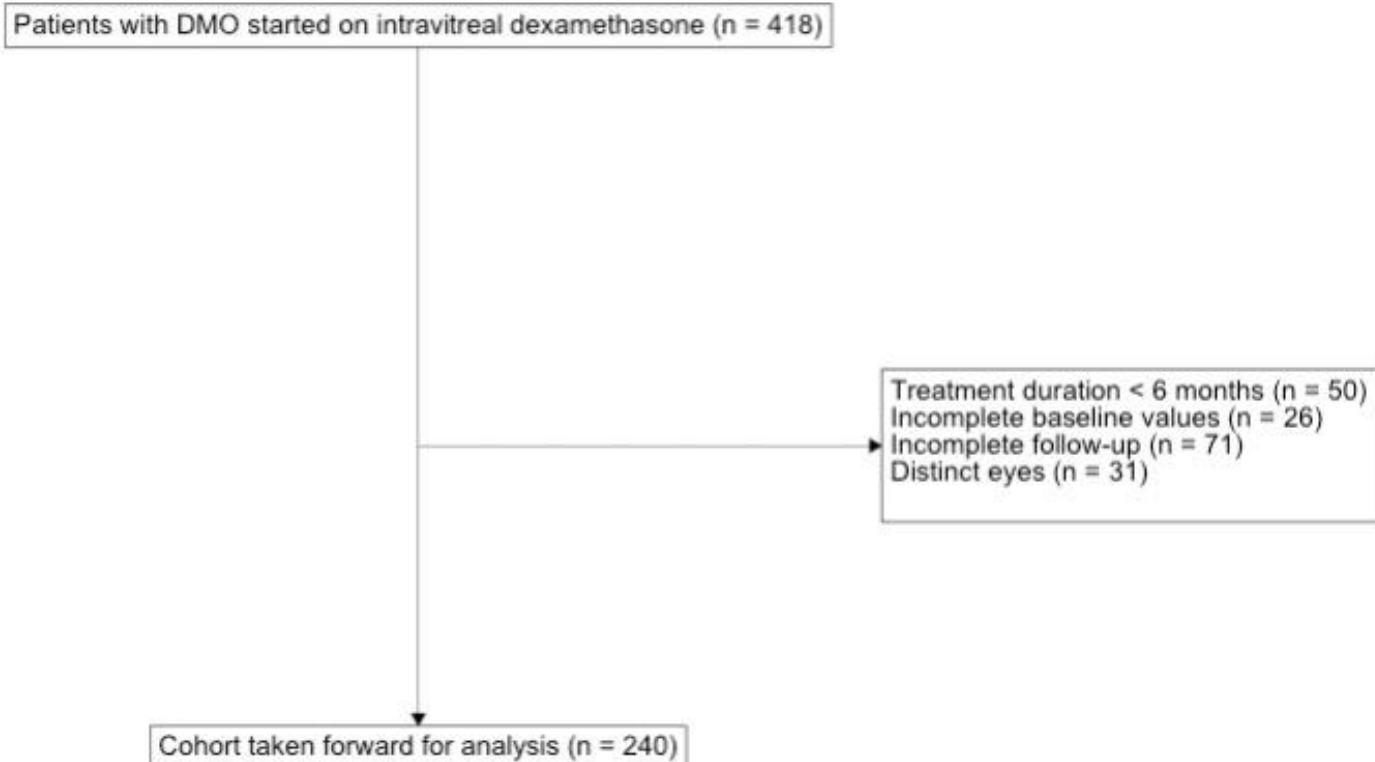

Supplement: s1 [file s1]
