# Supplementary material for: Visual and Anatomical Outcomes of a Single Intravitreal Dexamethasone in Diabetic Macular Edema: An 8 Year Real-World Study
Source: MDPI journal article supplement (doi:10.3390/jcm12123878), 2023-06-06

(a) Duration of positive visual response (benefit of 5 letters or more)

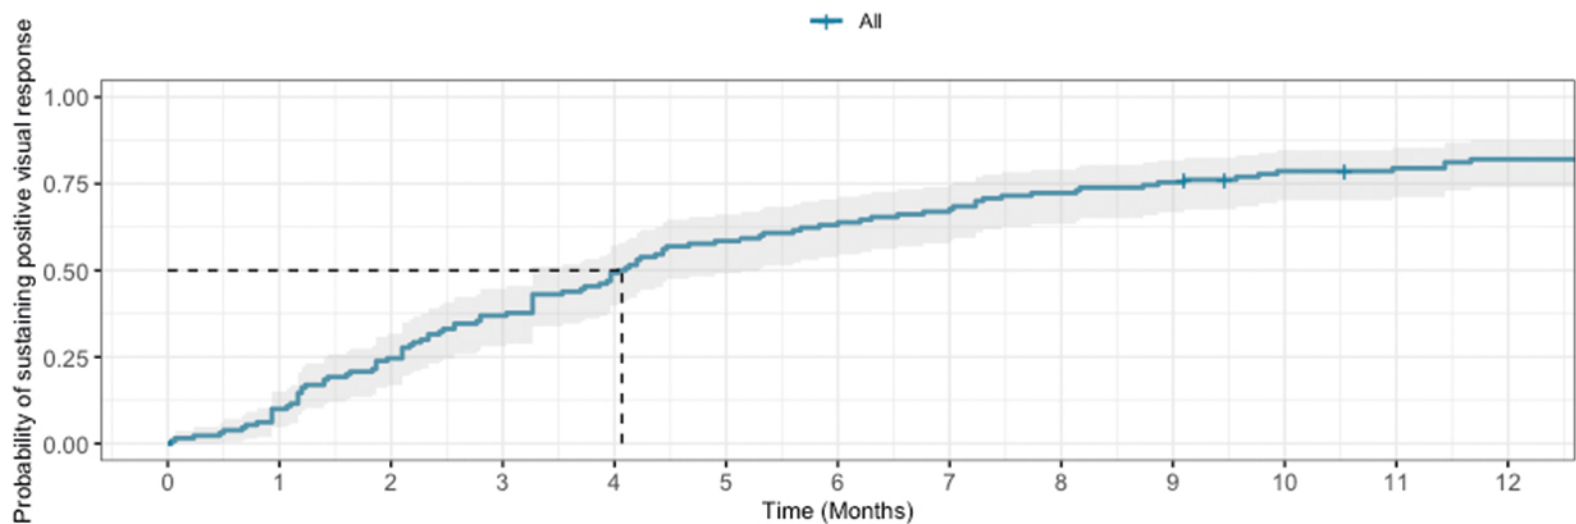

Number at risk

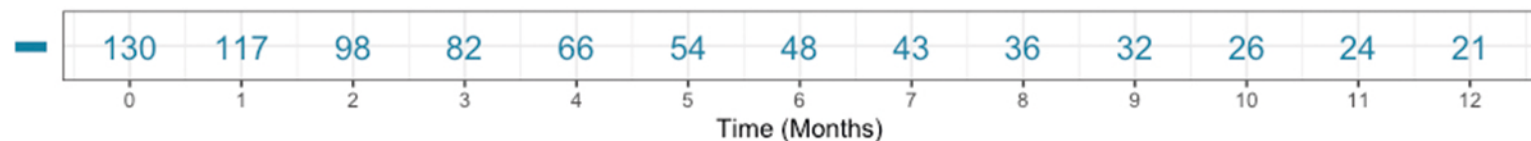

(b) Duration of positive visual response (benefit of 10 letters or more)

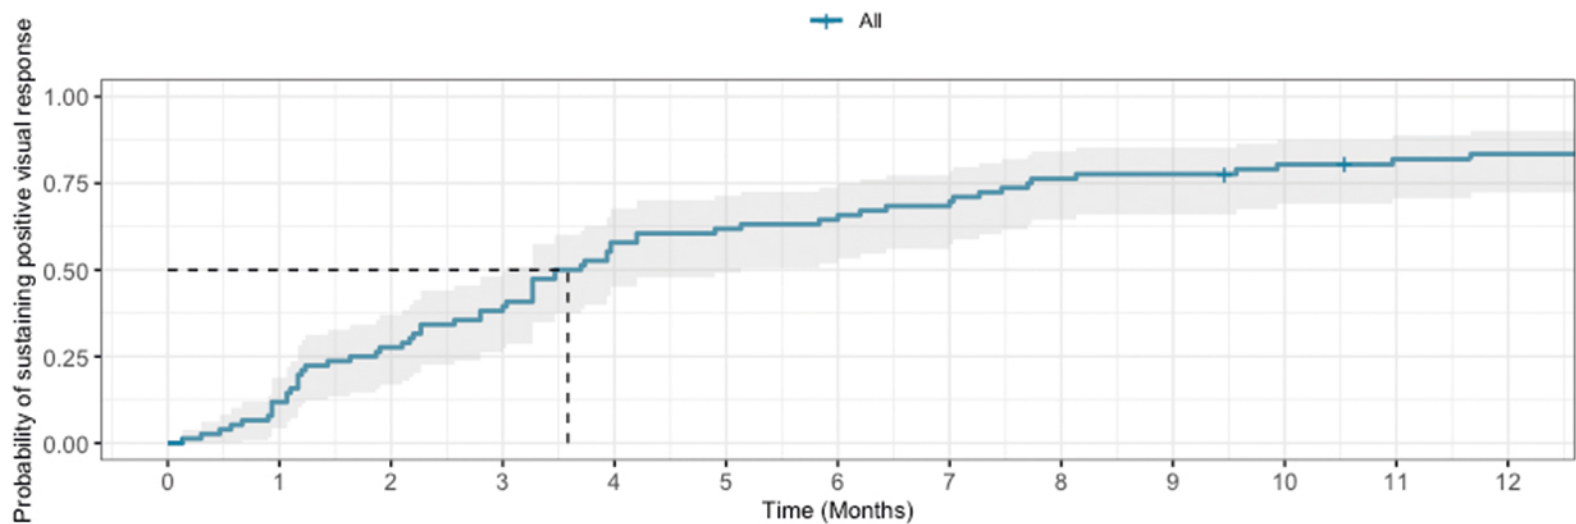

Number at risk

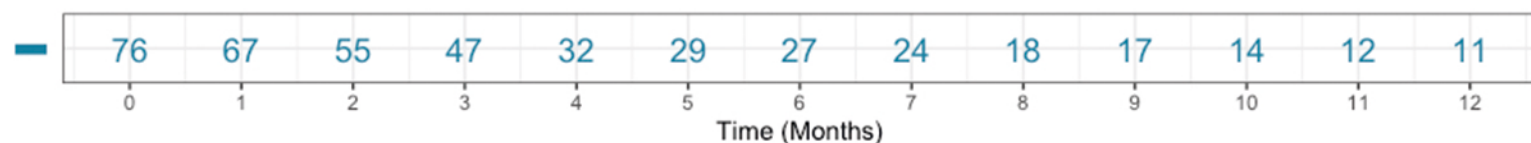

Supplement: s1 [file s1]
